# Supplementary material for: Plasmin reduces fibronectin deposition by mesangial cells in a protease-activated receptor-1 independent manner
Source: PubMed Central journal article supplement — Biochem Biophys Rep. 2017 Mar 29;10:152–6. doi: 10.1016/j.bbrep.2017.03.009 (PMC5637235; doi:10.1016/j.bbrep.2017.03.009), 2017-03-29
Supplement: mmc1.pdf [file mmc1.pdf]

**SupplementalTable 1:** proteases significantly expressed above background divided by their catalytic class.

| Number                    | Symbol | ENTREZ_GENE_ID | GENE NAME (ENTREZ)                                              |
|---------------------------|--------|----------------|-----------------------------------------------------------------|
| <b>Aspartic proteases</b> |        |                |                                                                 |
| 1                         | CTSD   | 1509           | cathepsin D                                                     |
| 2                         | PGA5   | 5222           | pepsinogen 5, group I (pepsinogen A)                            |
| 3                         | REN    | 5972           | renin                                                           |
| <b>Cystein proteases</b>  |        |                |                                                                 |
| 1                         | CTSC   | 1075           | cathepsin C                                                     |
| 2                         | CTSF   | 8722           | cathepsin F                                                     |
| 3                         | CTSH   | 1512           | cathepsin H                                                     |
| 4                         | CTSW   | 1521           | cathepsin W                                                     |
| 5                         | PARK7  | 11315          | parkinson protein 7                                             |
| 6                         | OTUB1  | 55611          | OTU deubiquitinase, ubiquitin aldehyde binding 1                |
| 7                         | USP14  | 9097           | ubiquitin specific peptidase 14 (tRNA-guanine transglycosylase) |
| 8                         | USP4   | 7375           | ubiquitin specific peptidase 4 (proto-oncogene)                 |
| <b>Metalloproteases</b>   |        |                |                                                                 |
| 1                         | ACE    | 1636           | angiotensin I converting enzyme                                 |
| 2                         | ADAM8  | 101            | ADAM metallopeptidase domain 8                                  |
| 3                         | ADAM15 | 8751           | ADAM metallopeptidase domain 15                                 |
| 4                         | ADAM19 | 8728           | ADAM metallopeptidase domain 19                                 |
| 5                         | AFG3L2 | 10939          | AFG3-like AAA ATPase 2                                          |
| 6                         | AMSH   | 10617          | STAM binding protein                                            |
| 7                         | ANPEP  | 290            | alanyl aminopeptidase, membrane                                 |
| 8                         | C9orf3 | 84909          | chromosome 9 open reading frame 3                               |
| 9                         | BMP1   | 649            | bone morphogenetic protein 1                                    |
| 10                        | CPD    | 1362           | carboxypeptidase D                                              |
| 11                        | CPM    | 1368           | carboxypeptidase M                                              |
| 12                        | CPZ    | 8532           | carboxypeptidase Z                                              |
| 13                        | DPEP1  | 1800           | dipeptidase 1                                                   |
| 14                        | ECE1   | 1889           | endothelin converting enzyme 1                                  |
| 15                        | ENPEP  | 2028           | glutamyl aminopeptidase                                         |
| 16                        | FACE2  | 9986           | Ras converting CAAX endopeptidase 1                             |

|    |         |       |                                                              |
|----|---------|-------|--------------------------------------------------------------|
| 17 | MME     | 4311  | membrane metallo-endopeptidase                               |
| 18 | MMP7    | 4316  | matrix metallopeptidase 7                                    |
| 19 | MMP11   | 4320  | matrix metallopeptidase 11                                   |
| 20 | MMP14   | 4323  | matrix metallopeptidase 14                                   |
| 21 | MMP15   | 4324  | matrix metallopeptidase 15                                   |
| 22 | MMP25   | 64386 | matrix metallopeptidase 25                                   |
| 23 | NPEPPS  | 9520  | aminopeptidase puromycin sensitive                           |
| 24 | PAPPA   | 5069  | pregnancy-associated plasma protein A, pappalysin 1          |
| 25 | PEPD    | 5184  | peptidase D                                                  |
| 26 | PGCP    | 10404 | carboxypeptidase Q                                           |
| 27 | RNPEP   | 6051  | arginyl aminopeptidase (aminopeptidase B)                    |
| 28 | XPNPEP2 | 7512  | X-prolyl aminopeptidase (aminopeptidase P) 2, membrane-bound |

#### Serine proteases

|    |       |       |                                               |
|----|-------|-------|-----------------------------------------------|
| 1  | ACR   | 49    | acrosin                                       |
| 2  | C1R   | 715   | complement component 1, r subcomponent        |
| 3  | C1S   | 716   | complement component 1, s subcomponent        |
| 4  | CFI   | 3426  | complement factor I                           |
| 5  | CMA1  | 1215  | chymase 1, mast cell                          |
| 6  | CTSG  | 1511  | cathepsin G                                   |
| 7  | ELA2A | 63036 | chymotrypsin like elastase family member 2A   |
| 8  | F7    | 2155  | coagulation factor VII                        |
| 9  | HPN   | 3249  | hepsin                                        |
| 10 | HTRA1 | 5654  | HtrA serine peptidase 1                       |
| 11 | KLK13 | 26085 | kallikrein related peptidase 13               |
| 12 | KLK6  | 5653  | kallikrein related peptidase 6                |
| 13 | KLKB1 | 3818  | kallikrein B1                                 |
| 14 | LTF   | 4057  | lactotransferrin                              |
| 15 | MASP2 | 10747 | mannan-binding lectin serine peptidase 2      |
| 16 | MST1  | 4485  | macrophage stimulating 1                      |
| 17 | PCSK3 | 5045  | proprotein convertase subtilisin/kexin type 3 |
| 18 | PCSK6 | 5046  | proprotein convertase subtilisin/kexin type 6 |
| 19 | PLAT  | 5327  | plasminogen activator, tissue                 |
| 20 | PLAU  | 5328  | plasminogen activator, urokinase              |

|                            |         |        |                                                            |
|----------------------------|---------|--------|------------------------------------------------------------|
| 21                         | PLG     | 5340   | plasminogen                                                |
| 22                         | PRCP    | 5547   | prolylcarboxypeptidase                                     |
| 23                         | PROC    | 5624   | protein C, inactivator of coagulation factors Va and VIIIa |
| 24                         | PRSS8   | 5652   | protease, serine 8                                         |
| 25                         | PRSS22  | 64063  | protease, serine 22                                        |
| 26                         | RHBDL   | 9028   | rhomboid, veinlet-like 1 (Drosophila)                      |
| 27                         | SEC11A  | 23478  | SEC11 homolog A, signal peptidase complex subunit          |
| 28                         | ST14    | 6768   | suppression of tumorigenicity 14                           |
| 29                         | TMPRSS6 | 164656 | transmembrane protease, serine 6                           |
| 30                         | TPP1    | 1200   | tripeptidyl peptidase I                                    |
| <b>Threonine proteases</b> |         |        |                                                            |
| 1                          | GGT1    | 2678   | gamma-glutamyltransferase 1                                |
